# Supplementary material for: Efficacy and Safety of Continuous Risankizumab Therapy vs Treatment Withdrawal in Patients With Moderate to Severe Plaque Psoriasis: A Phase 3 Randomized Clinical Trial
Source: PubMed Central journal article supplement — JAMA Dermatol. 2020 Apr 8;156(6):1–11. doi: 10.1001/jamadermatol.2020.0723 (PMC7142813; doi:10.1001/jamadermatol.2020.0723), 2020-04-08
Supplement: jamadermatol-156-649-s003.pdf [file jamadermatol-156-649-s003.pdf]

# Data Sharing Statement

Blauvelt. Efficacy and Safety of Continuous Risankizumab Therapy vs Treatment Withdrawal in Moderate to Severe Plaque Psoriasis. *JAMA Dermatol.* Published April 08, 2020. 10.1001/jamadermatol.2020.0723

## Data

**Data available:** Yes

**Data types:** Deidentified participant data, Participant data with identifiers, Data dictionary, Other (please specify)

**Additional Information:** Our Company <https://www.abbvie.com/our-science/clinical-trials/clinical-trials-data-and-information-sharing/data-and-information-sharing-with-qualified-researchers.html>

**How to access data:** <https://www.abbvie.com/our-science/clinical-trials/clinical-trials-data-and-information-sharing/data-and-information-sharing-with-qualified-researchers.html>

**When available:** beginning date: 12-16-2019

## Supporting Documents

**Document types:** None

## Additional Information

**Who can access the data:** Data requests can be submitted at any time and the data will be accessible for 12 months, with possible extensions considered.

**Types of analyses:** AbbVie is committed to responsible data sharing regarding the clinical trials we sponsor. This includes access to anonymized, individual and trial-level data (analysis data sets), as well as other information (e.g., protocols and Clinical Study Reports), as long as the trials are not part of an ongoing or planned regulatory submission. This includes requests for clinical trial data for unlicensed products and indications.

**Mechanisms of data availability:** This clinical trial data can be requested by any qualified researchers who engage in rigorous, independent scientific research, and will be provided following review and approval of a research proposal and Statistical Analysis Plan (SAP) and execution of a Data Sharing Agreement (DSA). Data requests can be submitted at any time and the data will be accessible for 12 months, with possible extensions considered. For more information on the process, or to submit a request, visit the following link: <https://www.abbvie.com/our-science/clinical-trials/clinical-trials-data-and-information-sharing/data-and-information-sharing-with-qualified-researchers.html>.

**Any additional restrictions:** This clinical trial data can be requested by any qualified researchers who engage in rigorous, independent scientific research, and will be provided following review and approval of a research proposal and Statistical Analysis Plan (SAP) and execution of a Data Sharing Agreement (DSA).
